# Supplementary material for: Nanoporous Gold Monolith for High Loading of Unmodified Doxorubicin and Sustained Co-Release of Doxorubicin-Rapamycin
Source: MDPI journal article supplement (doi:10.3390/nano11010208), 2021-01-15
Supplement: s1 [file s1]

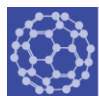

Supporting Information

# **Nanoporous Gold Monolith for High Loading of Unmodified Doxorubicin and Sustained Co-Release of Doxorubicin-Rapamycin**

**Jay K. Bhattarai, Dharmendra Neupane, Bishal Nepal, Alexei V. Demchenko and Keith J. Stine \***

Department of Chemistry and Biochemistry, University of Missouri–St. Louis, Saint Louis, MO 63121, USA; jkboxv3@mail.umsl.edu (J.K.B.); dnfzf@mail.umsl.edu (D.N.); bnff8@mail.umsl.edu (B.N.); demchenkoa@umsl.edu (A.V.D.)

\* Correspondence: kstine@umsl.edu

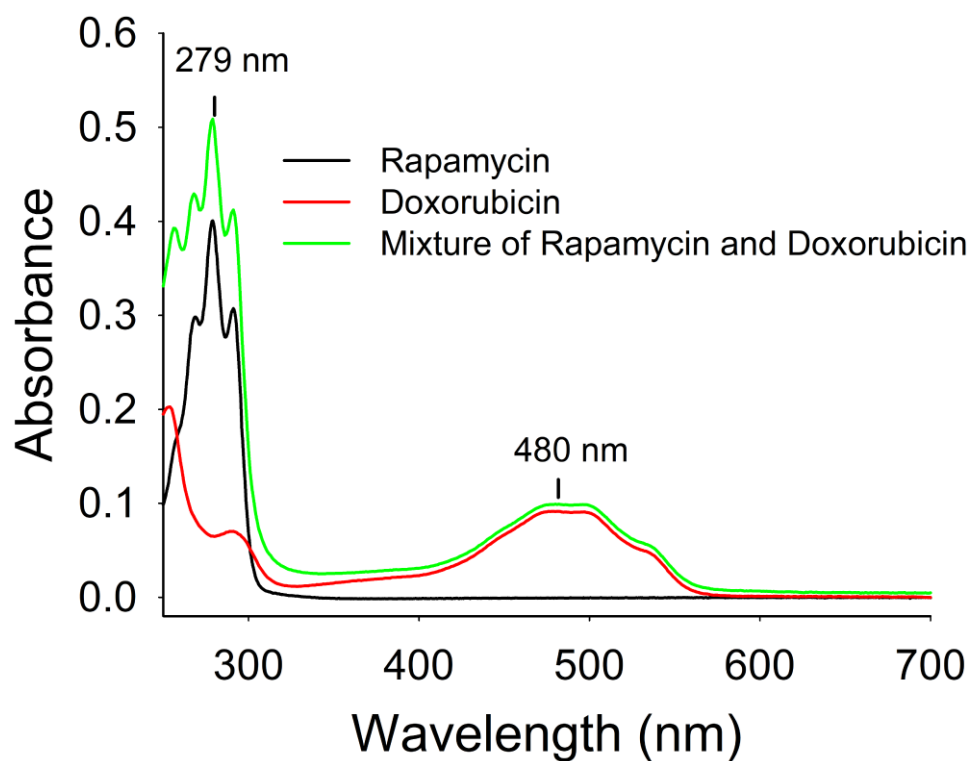

**Figure S1.** UV-Vis absorption spectra of 10 mM rapamycin (RAPA) and doxorubicin (DOX) separately and as a mixture. Peak wavelength of 480 nm and 279 nm were used for quantifying the release of DOX and RAPA, respectively.

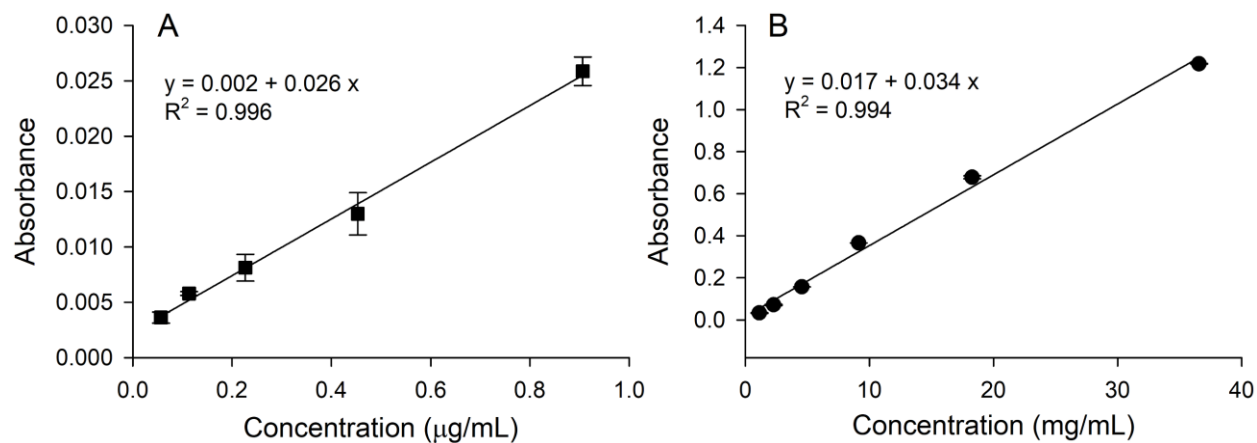

**Figure S2.** Standard calibration plots of (A) DOX and (B) RAPA.

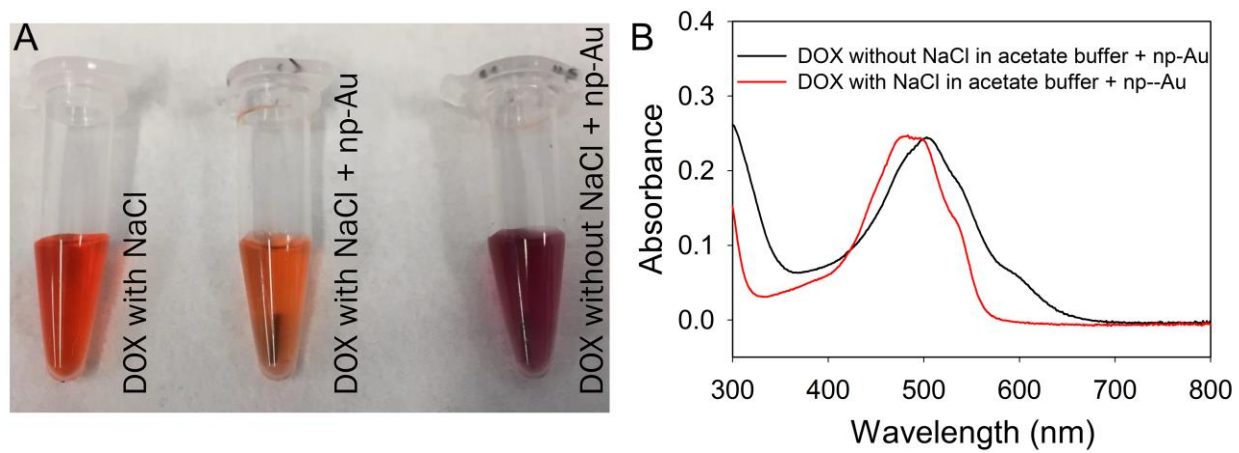

**Figure S3.** Photographic image and UV-spectra of DOX after 24 h of loading onto np-Au at room temperature showing importance of NaCl to avoid degradation in the presence of np-Au.
